# Supplementary material for: Speech Therapy for Poststroke Aphasia: A Systematic Review and Network Meta-Analysis of Randomized Controlled Trials
Source: Research Square preprint supplement (doi:10.21203/rs.3.rs-4312160/v1), 2024-05-16
Supplement: Supplementary file 3 [file ba96a6e9e6dcf058f954084c.docx]

**Supplementary Figure Legends**

Supplementary Figure 1. Forest plots of pairwise meta-analyses and network meta-analyses of speech performance in all patients.

Supplementary Figure 2. Forest plots of pairwise meta-analyses and network meta-analyses of speech performance of patients in chronic phase.

Supplementary Figure 3. Forest plots of pairwise meta-analyses and network meta-analyses of motor aphasia performance in all patients.

Supplementary Figure 4. Forest plots of pairwise meta-analyses and network meta-analyses of motor aphasia performance of patients in chronic phase.

Supplement Figure 5. Forest plots of pairwise meta-analyses and network meta-analyses of sensory aphasia performance in all patients.

Supplementary Figure 6. Forest plots of pairwise meta-analyses and network meta-analyses of sensory aphasia performance of patients in chronic phase.


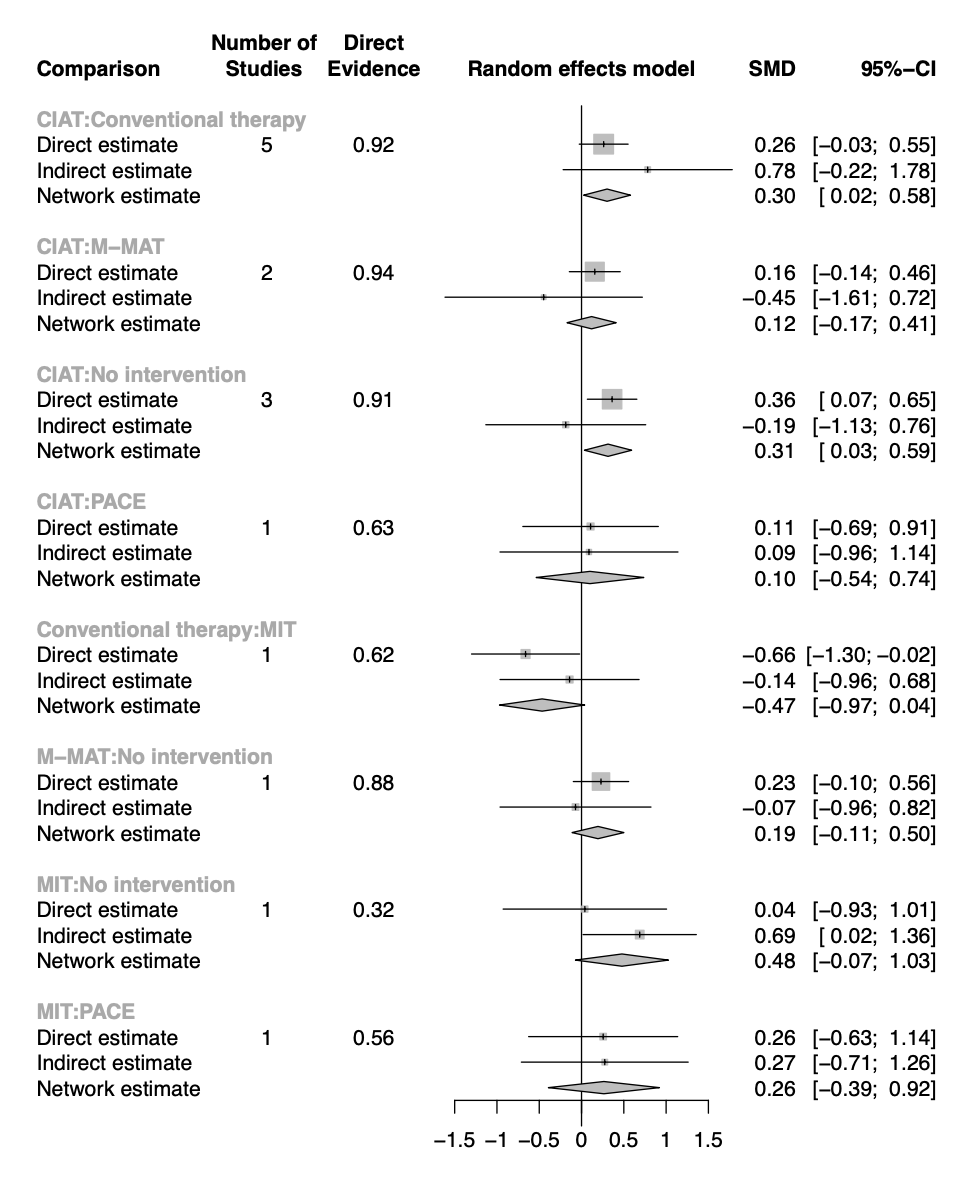


Supplementary Figure 1. Forest plots of pairwise meta-analyses and network meta-analyses of speech performance in all patients. SMD, standard mean difference; 95% CI, 95% credible interval; CIAT, constraint-induced aphasia therapy; PACE, promoting aphasics’ communicative effectiveness; CSLT, computerized speech and language therapy; MIT, melodic intonation therapy; M-MAT, multimodality aphasia therapy.


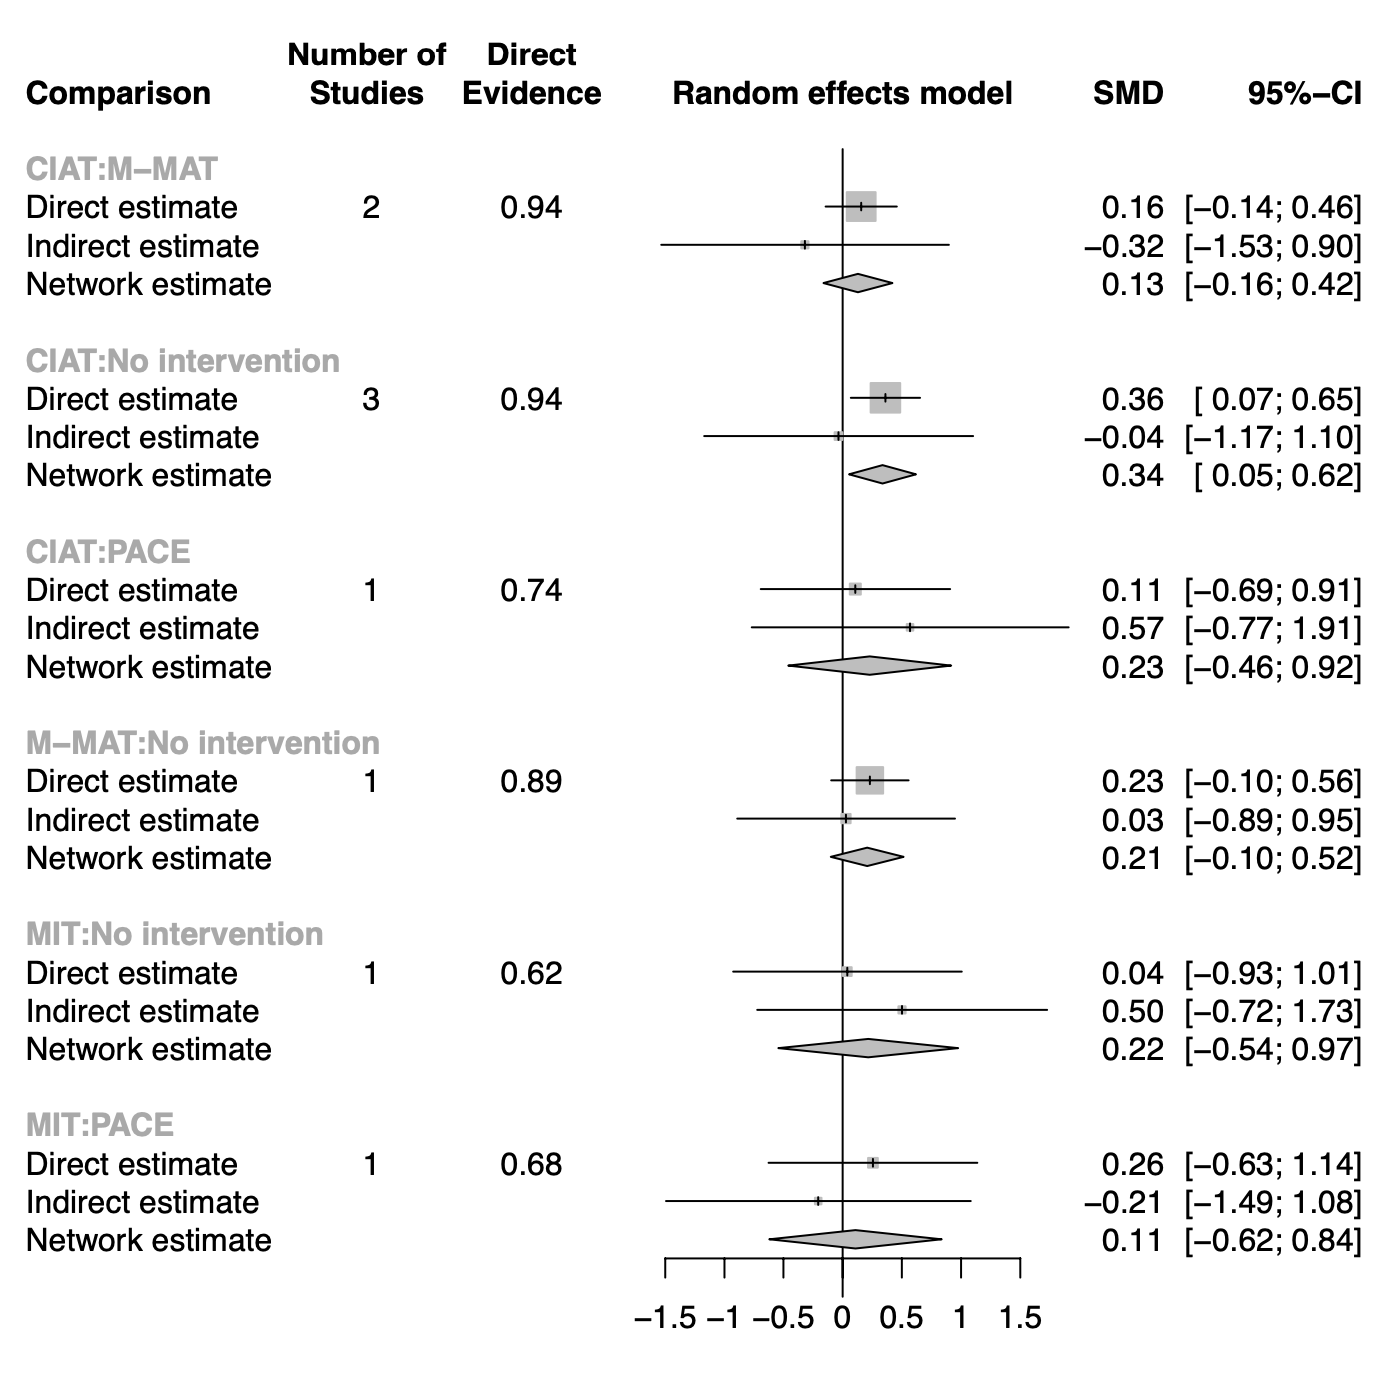


Supplementary Figure 2. Forest plots of pairwise meta-analyses and network meta-analyses of speech performance of patients in chronic phase. SMD, standard mean difference; 95% CI, 95% credible interval; CIAT, constraint-induced aphasia therapy; PACE, promoting aphasics’ communicative effectiveness; CSLT, computerized speech and language therapy; MIT, melodic intonation therapy; M-MAT, multimodality aphasia therapy.


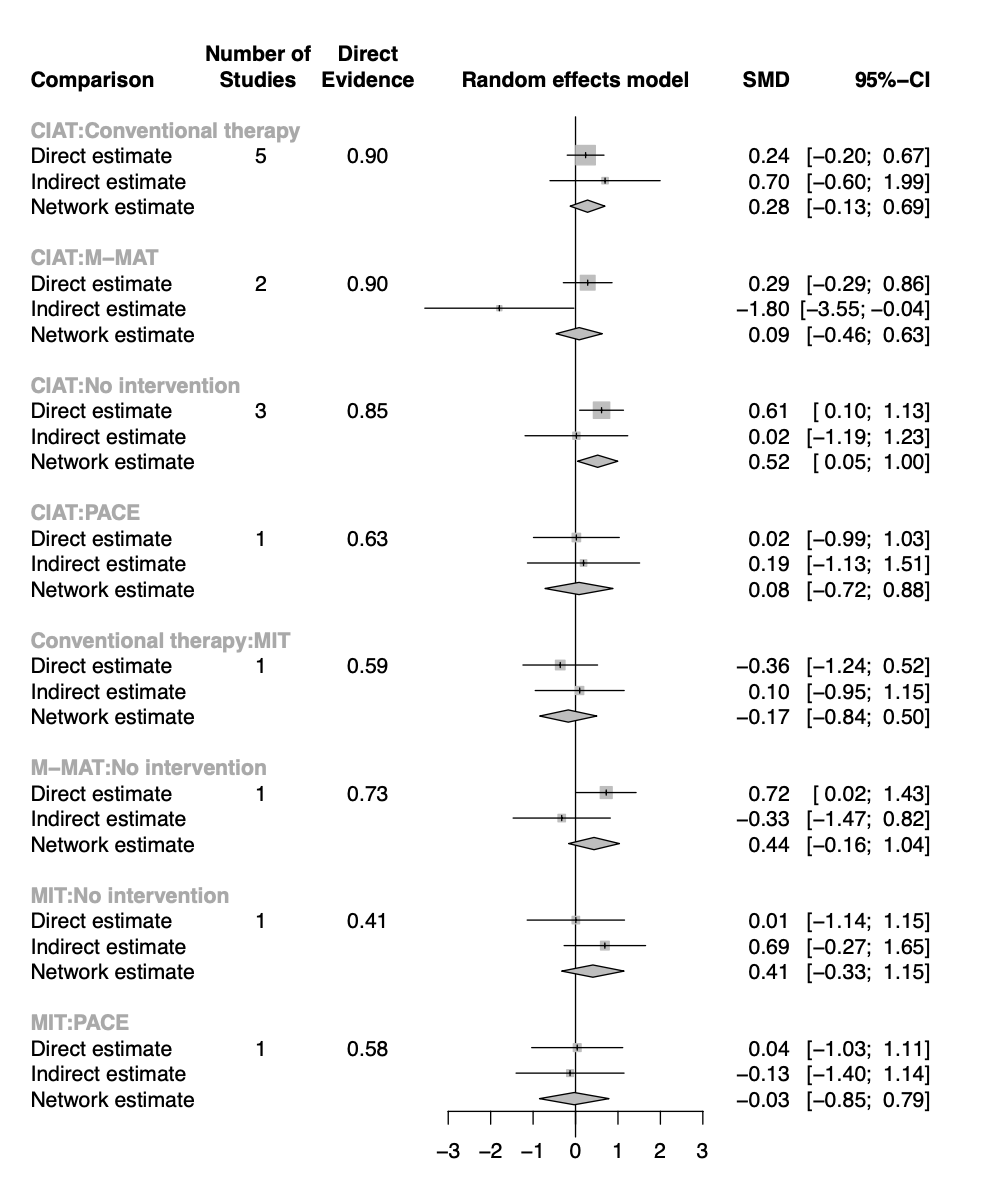
Supplementary Figure 3. Forest plots of pairwise meta-analyses and network meta-analyses of motor aphasia performance in all patients. SMD, standard mean difference; 95% CI, 95% credible interval; CIAT, constraint-induced aphasia therapy; PACE, promoting aphasics’ communicative effectiveness; MIT, melodic intonation therapy; M-MAT, multimodality aphasia therapy.


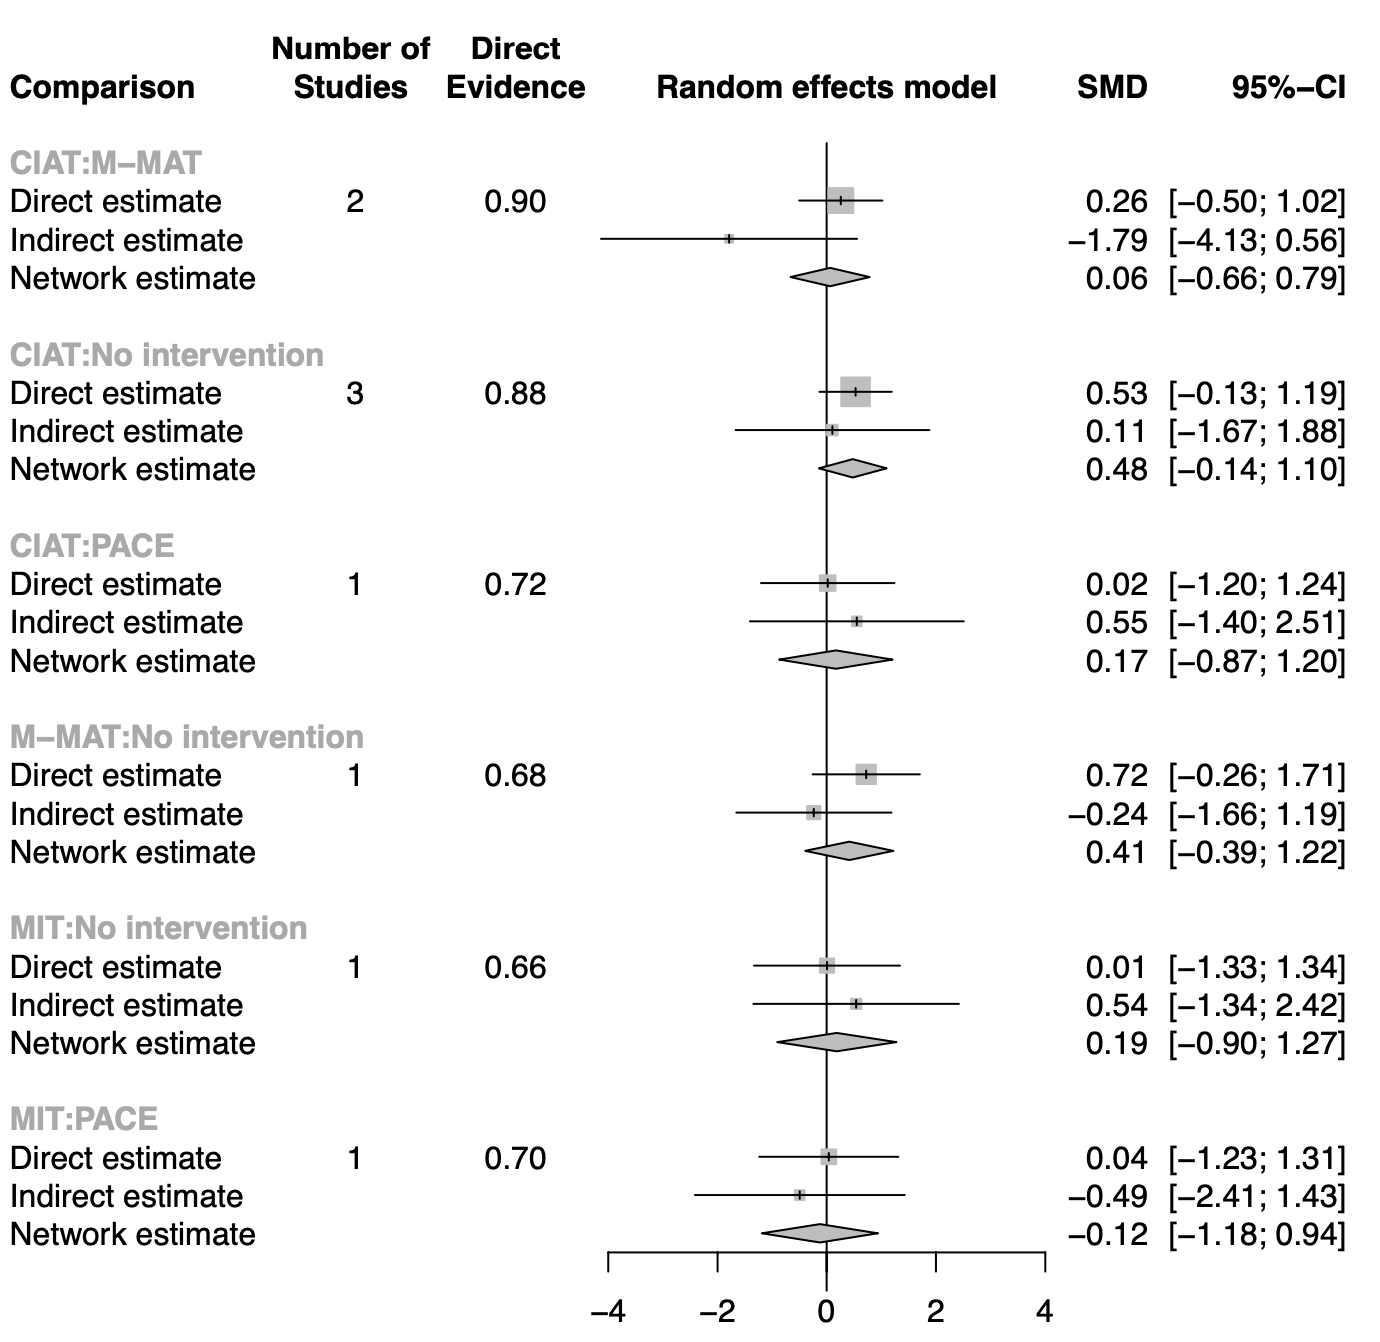
Supplementary Figure 4. Forest plots of pairwise meta-analyses and network meta-analyses of motor aphasia performance of patients in chronic phase. SMD, standard mean difference; 95% CI, 95% credible interval; CIAT, constraint-induced aphasia therapy; PACE, promoting aphasics’ communicative effectiveness; MIT, melodic intonation therapy; M-MAT, multimodality aphasia therapy.


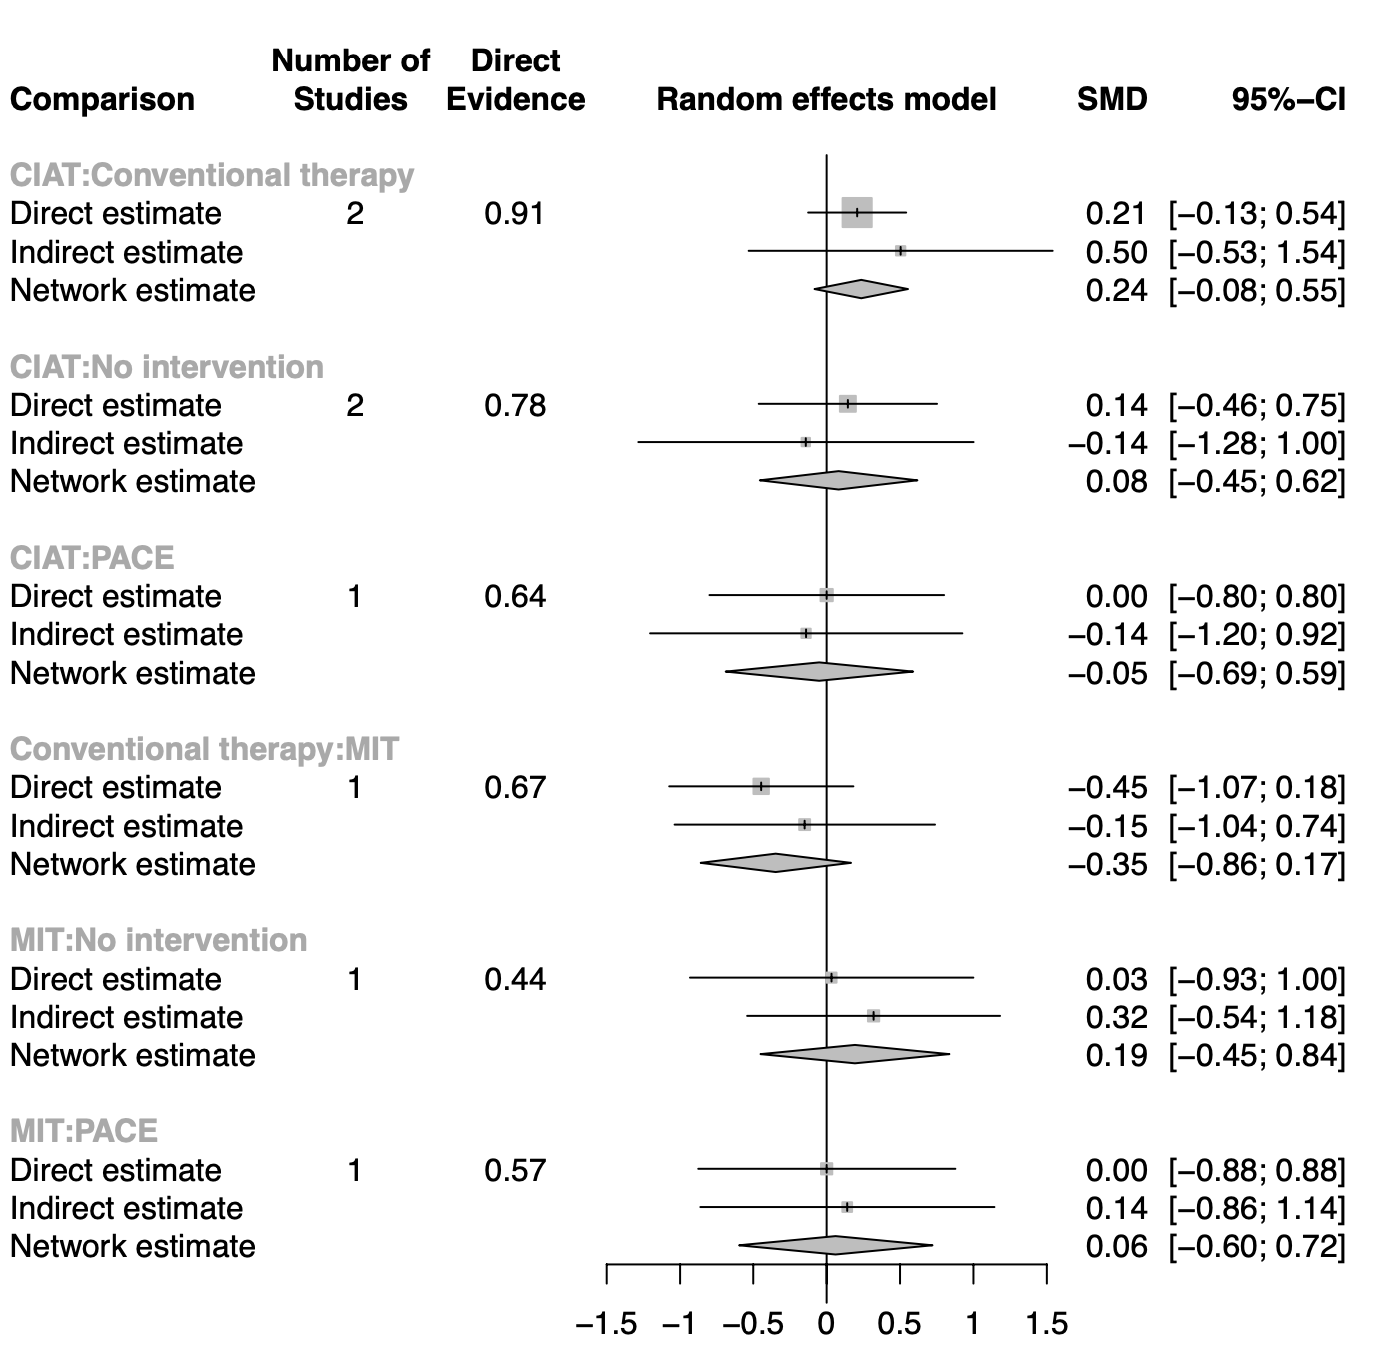
Supplement Figure 5. Forest plots of pairwise meta-analyses and network meta-analyses of sensory aphasia performance in all patients. SMD, standard mean difference; 95% CI, 95% credible interval; CIAT, constraint-induced aphasia therapy; PACE, promoting aphasics’ communicative effectiveness; MIT, melodic intonation therapy.


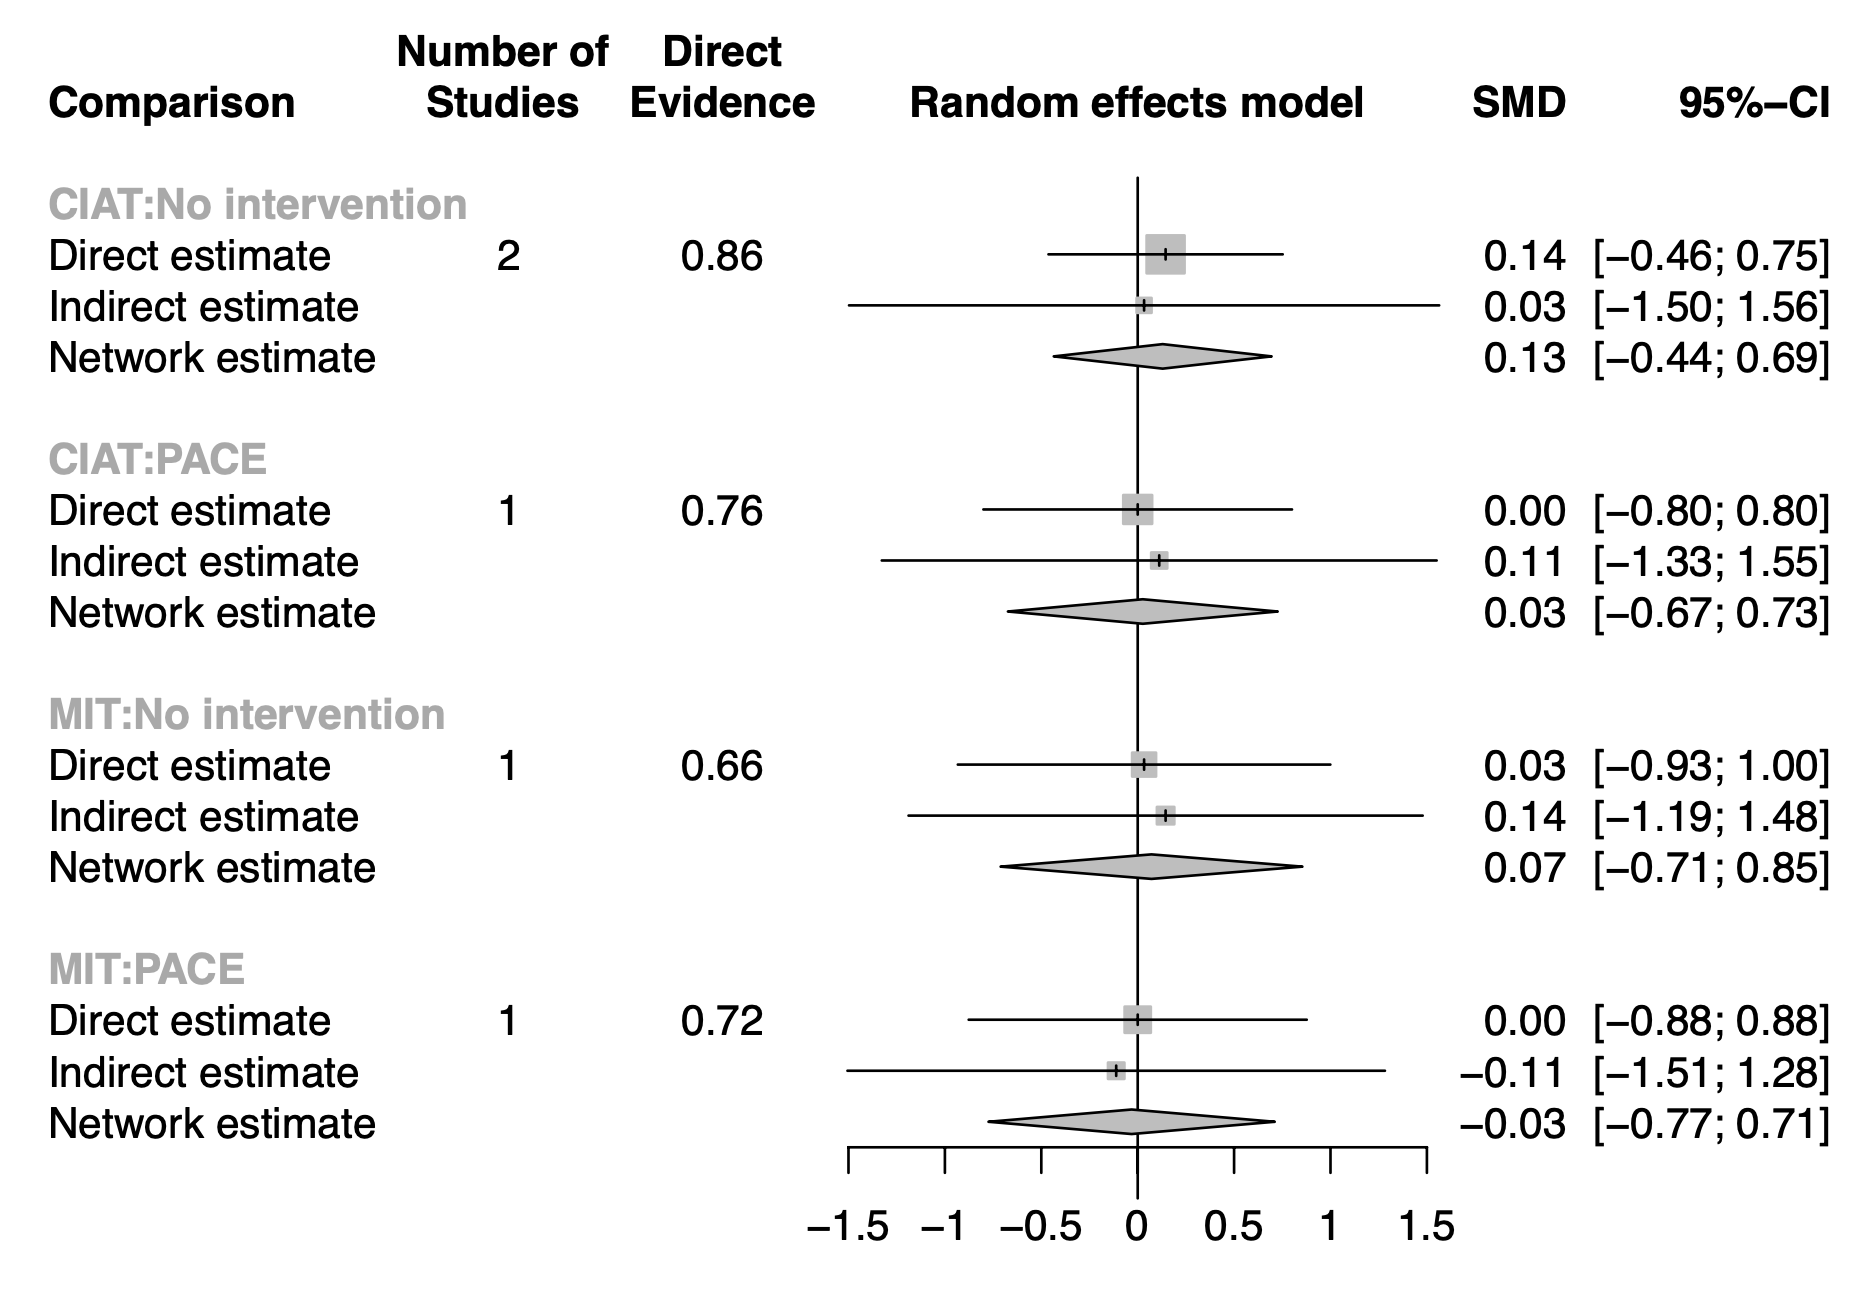
Supplementary Figure 6. Forest plots of pairwise meta-analyses and network meta-analyses of sensory aphasia performance of patients in chronic phase. SMD, standard mean difference; 95% CI, 95% credible interval; CIAT, constraint-induced aphasia therapy; PACE, promoting aphasics’ communicative effectiveness; MIT, melodic intonation therapy.

**Supplementary Table Legends**

Supplementary Table 1. Characteristics of the Selected Randomized Controlled Trials

Supplementary Table 2. Assessment of Inconsistencies Among Studies Regarding Speech Performance in All Patients

Supplementary Table 3. Network Meta-Analysis Results for Speech Performance of Patients in the Chronic Phase

Supplementary Table 4. Assessment of Inconsistencies Among Studies Regarding Speech Performance of Patients in the Chronic Phase

Supplementary Table 5. Network Meta-Analysis Results for Motor Aphasia Performance in All Patients

Supplementary Table 6. Assessment of Inconsistencies Among Studies Regarding Motor Aphasia Performance in All Patients

Supplementary Table 7. Network Meta-Analysis Results for Motor Aphasia Performance of Patients in the Chronic Phase

Supplementary Table 8. Assessment of Inconsistencies Among Studies Regarding Motor Aphasia Performance of Patients in the Chronic Phase

Supplementary Table 9. Network Meta-Analysis Results for Sensory Aphasia Performance in All Patients

Supplementary Table 10. Assessment of Inconsistencies Among Studies Regarding Sensory Aphasia Performance in All Patients

Supplementary Table 11. Network Meta-Analysis Results for Sensory Aphasia Performance of Patients in the Chronic Phase

Supplementary Table 12. Assessment of Inconsistencies Among Studies Regarding Sensory Aphasia Performance of Patients in the Chronic Phase

| Supplementary Table 1. Characteristics of the Selected Randomized Controlled Trials | | | | | | | | | |
| --- | --- | --- | --- | --- | --- | --- | --- | --- | --- |
| Author, year | Study design | Inclusion criteria | Intervention group | | | | | Longest follow-up | Outcome measurement |
| Group | Number of patients | Age (years), mean (SD) | Time since aphasia onset (months), mean (SD) | Intervention protocol |
| Kurland et al., 201622 | Parallel | 1) Diagnosed with poststroke aphasia; 2) Time since aphasia onset > 6 months | Experimental group | 12 | Mean (range) 68.6 (55-78) | 35.6 (6-142) | CIAT: 10 consecutive workdays × 3 h per day | At the end of the interventions | Picture naming, BNT and, BDAE |
| Control group | 12 | 65 (46-81) | 17.8 (7-82) | PACE: 10 consecutive workdays × 3 h per day |
| Ciccone et al., 201521 | Parallel | 1) Acute stroke diagnosed within 48 hours of hospital admission; 2) Aphasia diagnosis (confirmed by score of <13/20 on the shortened Frenchay Aphasia Screening Test) and aphasia severity score of <93.7 on the AQ of WAB | Experimental group | 10 | 69.4 (15.0) | Days 5.6 (2.3) | CIAT: 45-60 min, 5 days a week for 20 sessions over 5 weeks (15-20 h total) | 26 weeks after the interventions | WAB |
| Control group | 8 | 72.6 (14.1) | Days 4.8 (2.3) | Conventional therapy: 45-60 min, 5 days a week for 20 sessions over 5 weeks (15-20 h total) |
| Nenert et al., 201723 | Parallel | Diagnosis of single ischemic stroke in the left middle cerebral artery | Experimental group | 11 | 58 (10.6) | Median (IQR) 60.2 (48.9) | CIAT: 10 daily sessions × 4 h | 3 months after the interventions | Mini-CAL, BNT, and PPVT |
| Control group | 8 | 50 (13.3) | Median (IQR) 41.9 (30) | No intervention |
| Pierce et al., 202325 | Parallel | 1) Aged ≥17 years; 2) Chronic aphasia resulting from stroke (>6 months duration) confirmed by WAB-R-AQ < 93.8; 3); fluent in English prior to stroke | Experimental group | 10 | 60.5 (11.5) | Median (IQR) 46.5 (47.5) | CIAT: 2 h × 3 days × 5 weeks (30 h total) | 3 months after the interventions | WAB and naming battery |
| Control group | 16 | 66.1 (11.2) | Median (IQR) 30.5 (35.5) | M-MAT: 2 h × 3 days × 5 weeks (30 h total) |
| Rose et al., 202227 | Parallel | 1) Aged ≥18 years; 2) Chronic aphasia resulting from stroke of any type (>6 months duration) confirmed by an AQ of <93.8 on the WAB-R-AQ at the time of screening | Experimental group | 71 | Median (IQR) 63.93 (19.79) | Years, median (IQR) 2.41 (4.22) | CIAT: 3 h × 5 days per week × 2 weeks (30 h total) | 3 months after the interventions | WAB and naming battery |
| Experimental group | 75 | Median (IQR) 63.77 (21.02) | Years, median (IQR) 2.97 (3.81) | M-MAT: 3 h × 5 days per week × 2 weeks (30 h total) |
| Control group | 70 | Median (IQR) 63.16 (14.10) | Years, median (IQR) 2.58 (2.87) | No intervention |
| Sickert et al., 201328 | Parallel | First-ever stroke with aphasia in the subacute stage (time since lesion onset 1-4 months poststroke) | Experimental group | 50 | 60.7 (41-81) | Days 36.7 (28-84) | CIAT: 2 h per day × 15 days | 3 weeks after the interventions | AAT and CAL |
| Control group | 50 | 60.2 (34-84) | Days 32.9 (28-112) | Conventional therapy: 2 h per day × 15 days |
| Stahl et al., 201730 | Crossover | Poststroke chronic nonfluent aphasia | Experimental group | 6 | 45.5 (10.6) | 45.7 (26.8) | CIAT treatment for 3.5 h per session for 6 consecutive working days, followed by 6-day washout period, then crossover to conventional therapy for 3.5 h per session for 6 consecutive working days | At the end of the interventions | ACT |
| Control group | 8 | 53.3 (11.9) | 109.4 (84.5) | Conventional therapy for 3.5 h per session for 6 consecutive working days, followed by 6-day washout period, then crossover to CIAT for 3.5 h per session for 6 consecutive working days |
| Szaflarski et al., 201531 | Parallel | Chronic aphasia related to a single ischemic stroke in the left middle cerebral artery distribution | Experimental group | 14 | 57 (11) | Median (IQR) 38 (59) | CIAT: 4 h × 10 consecutive business days (40 h total) | 3 months after the interventions | BNT, PPVT, and mini-CAL |
| Control group | 10 | 51 (13) | Median (IQR) 30 (58) | No intervention |
| Vuksanović et al., 201833 | Crossover | Nonfluent poststroke aphasia | Experimental group | 8 | 61.4 (8.7) | Weeks 11.7 (13.7) | CIAT for 1 h × 5 times per week × 4 weeks, then crossover to conventional therapy 1 h × 5 times per week × 4 weeks | 4 weeks after the interventions | Cookie theft picture description task and BNT |
| Control group | 9 | 60.3 (10.5) | Weeks 15.8 (15.7) | Conventional therapy for 1 h × 5 times per week × 4 weeks, then crossover to CIAT for 1 h × 5 times per week × 4 weeks |
| Wilssens et al., 201534 | Parallel | 1) Adult age; 2) Single and first-ever stroke in the left hemisphere confirmed by structural brain imaging; 3) Fluent aphasia with a combined semantic and phonological deficit | Experimental group | 5 | 63 (8) | 61 (48) | CIAT for 2-3-h sessions per day × 9 or 10 consecutive working days | 1 week after the interventions | AAT and ANELT |
| Control group | 4 | 71 (9) | 52 (25) | Semantic therapy (BOX therapy) for 2-3-h sessions per day × 9 or 10 consecutive working days |
| Woldag et al., 201635 | Parallel | Acute aphasia after first-ever stroke | Experimental group | 20 | 71.3 (7.2) | Days 20.6 (10.9) | CIAT: 3 h × 10 workdays (30 h total) | At the end of the interventions | CAL and AAT |
| Control group | 20 | 70.3 (11.2) | Days 19.9 (10.0) | Conventional communication therapy: 3 h × 10 workdays (30 h total) |
| Palmer et al., 201924 | Parallel | 1) Aged ≥18 years; 2) Aphasia diagnosis confirmed by a speech and language therapist after one or more strokes at least 4 months before randomization; 3) Difficulties finding words but able to perform a simple matching task on the StepByStep computer program | Experimental group | 83 | 64.9 (13.0) | Years 2.9 (2.9) | CSLT for 6 months | 6 months after the interventions | TOMs and change in word finding performance |
| Control group | 86 | 64.9 (13.0) | Years 2.8 (2.6) | Conventional communication for 6 months |
| Spaccavento et al., 202129 | Parallel | 1) Aphasia resulting from unilateral left-hemisphere lesion; 2) Absence of premorbid cognitive impairment or mental health disorders | Experimental group | 13 | 57.38 (9.23) | Days 25.92 (25.99) | CSLT: 1 session per day of ±50 min × 5 days a week × 8 weeks | At the end of the interventions | AAT |
| Control group | 9 | 64.11 (15.04) | Days 20 (10.66) | Conventional therapy: 1 session per day of ±50 min × 5 days a week × 8 weeks |
| Van Der Meulen et al., 201632 | Parallel | 1) Aged 18-80 years; 2) >1 year poststroke | Experimental group | 10 | 58.1 (15.2) | 33.1 (19.4) | MIT: 5 h per week × 6 weeks | At the end of the interventions | ANELT and AAT |
| Control group | 7 | 63.6 (12.7) | 42.6 (23.7) | No intervention |
| Raglio et al., 201626 | Parallel | Patients with poststroke aphasia | Experimental group | 10 | 58.6 (12.4) | Years 3.4 (4.1) | MIT: individual 30-min sessions twice a week × 15 weeks (30 sessions total) | At the end of the interventions | AAT, Token test, and BNT |
| Control group | 10 | 56.7 (10.5) | Years 3.8 (3.3) | PACE: individual 45-min sessions twice a week × 15 weeks (30 sessions total) |
| Zhang et al., 202136 | Parallel | 1) Meeting the diagnostic criteria for nonfluent aphasia; 2) Time since aphasia onset ≥15, hospitalized patients; 3) Aged 18-70 years | Experimental group | 20 | 52.90 (9.08) | 2.57 (1.74) | MIT: 30 min × 5 times a week × 8 consecutive weeks | At the end of the interventions | BDAE |
| Control group | 20 | 54.05 (10.81) | 1.96 (1.38) | Conventional communication therapy: 30 min × 5 times a week × 8 consecutive weeks |
| CIAT, constraint-induced aphasia therapy; PACE, promoting aphasics’ communicative effectiveness; M-MAT, multimodality aphasia therapy; BDAE, Boston Diagnostic Aphasia Examination; BNT, Boston Naming Test; CSLT, computerized speech and language therapy; AAT, Aachener Aphasia Test; ANELT, Amsterdam–Nijmegen Everyday Language Test; WAB-AQ, Western Aphasia Battery–Aphasia Quotient; PPVT, Peabody Picture Vocabulary Test; mini-CAL, mini-Communicative Activity Log; TOMs, Therapy Outcome Measures; CETI, Communicative Effectiveness Index; CAL, Communicative Activity Log; ACT, Action Communication Test; MIT, melodic intonation therapy; SD, standard deviation; IQR, interquartile range. | | | | | | | | | |

| Supplementary Table 2. Assessment of Inconsistencies Among All Studies Regarding Speech Performance in All Patients | | | | | | | | |
| --- | --- | --- | --- | --- | --- | --- | --- | --- |
| Comparison | Number of studies | Network meta-analysis | Direct comparison | Indirect comparison | Difference between direct and indirect comparisons | Lower limit of 95% CI | Upper limit of 95% CI | *P* value |
| CIAT vs. conventional therapy | 5 | 0.3019 | 0.2619 | 0.7823 | 0.5204 | −1.5608 | 0.5201 | 0.327 |
| CIAT vs. M-MAT | 2 | 0.119 | 0.1567 | −0.4476 | 0.6043 | −0.6002 | 1.8088 | 0.3255 |
| CIAT vs. no intervention | 3 | 0.3134 | 0.3613 | −0.1865 | 0.5478 | −0.4414 | 1.5371 | 0.2778 |
| CIAT vs. PACE | 1 | 0.1 | 0.1069 | 0.0879 | 0.019 | −1.3033 | 1.3413 | 0.9775 |
| Conventional therapy vs. MIT | 1 | −0.4661 | −0.662 | −0.1416 | −0.5204 | −1.5608 | 0.5201 | 0.327 |
| M-MAT vs. no intervention | 1 | 0.1944 | 0.2301 | −0.0713 | 0.3014 | −0.6486 | 1.2514 | 0.5341 |
| MIT vs. no intervention | 1 | 0.4776 | 0.0392 | 0.6879 | −0.6487 | −1.8237 | 0.5264 | 0.2793 |
| MIT vs. PACE | 1 | 0.2642 | 0.2557 | 0.2747 | −0.019 | −1.3413 | 1.3033 | 0.9775 |
| CI, credible interval; CIAT, constraint-induced aphasia therapy; PACE, promoting aphasics’ communicative effectiveness; CSLT, computerized speech and language therapy; MIT, melodic intonation therapy; M-MAT, multimodality aphasia therapy. | | | | | | | | |

| Supplementary Table 3. Network Meta-Analysis Results for Speech Performance of Patients in the Chronic Phase | | | | | | | |
| --- | --- | --- | --- | --- | --- | --- | --- |
| Pairwise meta-analysis | | | | | | | |
| **BOX therapy** | 0.23 [−1.09; 1.55] | - | - | - | - | - | - |
| 0.23 [−1.09; 1.55] | **CIAT** | - | 0.08 [−0.98; 1.14] | - | 0.16 [−0.14; 0.46] | 0.11 [−0.69; 0.91] | 0.36 [ 0.07; 0.65] |
| 0.27 [−1.45; 1.99] | 0.04 [−1.06; 1.14] | **CSLT** | 0.05 [−0.26; 0.35] | - | - | - | - |
| 0.31 [−1.38; 2.01] | 0.08 [−0.98; 1.14] | 0.05 [−0.26; 0.35] | **Conventional therapy** | - | - | - | - |
| 0.35 [−1.18; 1.88] | 0.12 [−0.65; 0.89] | 0.08 [−1.26; 1.43] | 0.04 [−1.27; 1.35] | **MIT** | - | 0.26 [−0.63; 1.14] | 0.04 [−0.93; 1.01] |
| 0.36 [−0.99; 1.71] | 0.13 [−0.16; 0.42] | 0.09 [−1.05; 1.23] | 0.05 [−1.05; 1.14] | 0.01 [−0.79; 0.81] | **M-MAT** | - | 0.23 [−0.10; 0.56] |
| 0.46 [−1.03; 1.95] | 0.23 [−0.46; 0.92] | 0.19 [−1.11; 1.49] | 0.15 [−1.12; 1.41] | 0.11 [−0.62; 0.84] | 0.10 [−0.63; 0.83] | **PACE** | - |
| 0.57 [−0.79; 1.92] | 0.34 [ 0.05; 0.62] | 0.30 [−0.84; 1.44] | 0.25 [−0.84; 1.35] | 0.22 [−0.54; 0.97] | 0.21 [−0.10; 0.52] | 0.11 [−0.61; 0.82] | **No intervention** |
| Network meta-analysis | | | | | | | |
| Data expressed as SMD [95% credible interval]. Significant results are underscored. “-” means data not applicable.  CIAT, constraint-induced aphasia therapy; PACE, promoting aphasics’ communicative effectiveness; CSLT, computerized speech and language therapy; MIT, melodic intonation therapy; M-MAT, multimodality aphasia therapy. | | | | | | | |

| Supplementary Table 4. Assessment of Inconsistencies Among Studies Regarding Speech Performance of Patients in the Chronic Phase | | | | | | | | |
| --- | --- | --- | --- | --- | --- | --- | --- | --- |
| Comparison | Number of studies | Network meta-analysis | Direct comparison | Indirect comparison | Difference between direct and indirect comparisons | Lower limit of 95% CI | Upper limit of 95% CI | P value |
| CIAT vs. M-MAT | 2 | 0.1293 | 0.1567 | −0.3187 | 0.4754 | −0.7765 | 1.7273 | 0.45668 |
| CIAT vs. no intervention | 3 | 0.3367 | 0.3613 | −0.0351 | 0.3964 | −0.7769 | 1.5697 | 0.5078 |
| CIAT vs. PACE | 1 | 0.2287 | 0.1069 | 0.569 | −0.462 | −2.022 | 1.098 | 0.5616 |
| M-MAT vs. no intervention | 1 | 0.2074 | 0.2301 | 0.0279 | 0.2022 | −0.7744 | 1.1788 | 0.6849 |
| MIT vs. no intervention | 1 | 0.2164 | 0.0392 | 0.5013 | −0.462 | −2.022 | 1.098 | 0.5616 |
| MIT vs. PACE | 1 | 0.1084 | 0.2557 | −0.2063 | 0.462 | −1.098 | 2.022 | 0.5616 |
| CIAT vs. M-MAT | 2 | 0.1293 | 0.1567 | −0.3187 | 0.4754 | −0.7765 | 1.7273 | 0.45668 |
| CIAT vs. no intervention | 3 | 0.3367 | 0.3613 | −0.0351 | 0.3964 | −0.7769 | 1.5697 | 0.5078 |
| CI, credible interval; CIAT, constraint-induced aphasia therapy; PACE, promoting aphasics’ communicative effectiveness; CSLT, computerized speech and language therapy; MIT, melodic intonation therapy; M-MAT, multimodality aphasia therapy. | | | | | | | | |

| Supplementary Table 5. Network Meta-Analysis Results for Motor Aphasia Performance in All Patients | | | | | | | |
| --- | --- | --- | --- | --- | --- | --- | --- |
| Pairwise meta-analysis | | | | | | | |
| **CSLT** | - | - | - | - | - | 0.61 [ 0.03; 1.18] | - |
| 0.32 [−0.39; 1.03] | **CIAT** | −0.09 [−1.55; 1.36] | 0.29 [−0.29; 0.86] | 0.02 [−0.99; 1.03] | - | 0.24 [−0.20; 0.67] | 0.61 [ 0.10; 1.13] |
| 0.23 [−1.39; 1.85] | −0.09 [−1.55; 1.36] | **BOX therapy** | - | - | - | - | - |
| 0.41 [−0.48; 1.30] | 0.09 [−0.46; 0.63] | 0.18 [−1.37; 1.73] | **M-MAT** | - | - | - | 0.72 [ 0.02; 1.43] |
| 0.40 [−0.63; 1.44] | 0.08 [−0.72; 0.88] | 0.18 [−1.48; 1.84] | −0.00 [−0.96; 0.95] | **PACE** | −0.04 [−1.11; 1.03] | - | - |
| 0.44 [−0.45; 1.32] | 0.11 [−0.57; 0.80] | 0.21 [−1.40; 1.81] | 0.03 [−0.82; 0.87] | 0.03 [−0.79; 0.85] | **MIT** | 0.36 [−0.52; 1.24] | 0.01 [−1.14; 1.15] |
| 0.61 [ 0.03; 1.18] | 0.28 [−0.13; 0.69] | 0.38 [−1.13; 1.89] | 0.20 [−0.48; 0.87] | 0.20 [−0.65; 1.05] | 0.17 [−0.50; 0.84] | **Conventional therapy** | - |
| 0.84 [ 0.01; 1.68] | 0.52 [ 0.05; 1.00] | 0.62 [−0.91; 2.15] | 0.44 [−0.16; 1.04] | 0.44 [−0.45; 1.33] | 0.41 [−0.33; 1.15] | 0.24 [−0.37; 0.84] | **No intervention** |
| Network meta-analysis | | | | | | | |
| Data expressed as SMD [95% credible interval]. Significant results are underscored. “-” means data not applicable.  CIAT, constraint-induced aphasia therapy; PACE, promoting aphasics’ communicative effectiveness; CSLT, computerized speech and language therapy; MIT, melodic intonation therapy; M-MAT, multimodality aphasia therapy. | | | | | | | |

| Supplementary Table 6. Assessment of Inconsistencies Among Studies Regarding Motor Aphasia Performance in All Patients | | | | | | | | |
| --- | --- | --- | --- | --- | --- | --- | --- | --- |
| Comparison | Number of studies | Network meta-analysis | Direct comparison | Indirect comparison | Difference between direct and indirect comparisons | Lower limit of 95% CI | Upper limit of 95% CI | *P* value |
| CIAT vs. conventional therapy | 5 | 0.2834 | 0.2375 | 0.6959 | −0.4585 | −1.8265 | 0.9096 | 0.5113 |
| CIAT vs. M-MAT | 2 | 0.086 | 0.2869 | −1.7956 | 2.0825 | 0.23504 | 3.9299 | 0.0272 |
| CIAT vs. no intervention | 3 | 0.5218 | 0.6132 | 0.0201 | 0.5931 | −0.7222 | 1.9085 | 0.3768 |
| CIAT vs. PACE | 1 | 0.082 | 0.0197 | 0.1885 | −0.1688 | −1.8327 | 1.495 | 0.8423 |
| Conventional therapy vs. MIT | 1 | −0.1709 | −0.3602 | 0.0982 | −0.4585 | −1.8266 | 0.9096 | 0.5113 |
| M-MAT vs. no intervention | 1 | 0.4359 | 0.7233 | −0.3254 | 1.0487 | −0.2952 | 2.3927 | 0.1262 |
| MIT vs. no intervention | 1 | 0.4093 | 0.0071 | 0.691 | −0.6839 | −2.179 | 0.8112 | 0.37 |
| MIT vs. PACE | 1 | −0.0305 | 0.0397 | −0.1292 | 0.1688 | −1.495 | 1.8327 | 0.8423 |
| CI, credible interval; CIAT, constraint-induced aphasia therapy; PACE, promoting aphasics’ communicative effectiveness; CSLT, computerized speech and language therapy; MIT, melodic intonation therapy; M-MAT, multimodality aphasia therapy. | | | | | | | | |

| Supplementary Table 7. Network Meta-Analysis Results for Motor Aphasia Performance of Patients in the Chronic Phase | | | | | | | |
| --- | --- | --- | --- | --- | --- | --- | --- |
| Pairwise meta-analysis | | | | | | | |
| **CSLT** | - | - | - | - | - | 0.80 [−0.17; 1.78] | - |
| 0.53 [−1.19; 2.24] | **CIAT** | −0.09 [−1.70; 1.51] | 0.26 [−0.50; 1.02] | 0.02 [−1.20; 1.24] | - | 0.27 [−1.13; 1.68] | 0.53 [−0.13; 1.19] |
| 0.43 [−1.92; 2.78] | −0.09 [−1.70; 1.51] | **BOX therapy** | - | - | - | - | - |
| 0.59 [−1.27; 2.45] | 0.06 [−0.66; 0.79] | 0.16 [−1.60; 1.92] | **M-MAT** | - | - | - | 0.72 [−0.26; 1.71] |
| 0.70 [−1.31; 2.70] | 0.17 [−0.87; 1.20] | 0.26 [−1.65; 2.18] | 0.11 [−1.13; 1.34] | **PACE** | −0.04 [−1.31; 1.23] | - | - |
| 0.82 [−1.24; 2.87] | 0.29 [−0.84; 1.43] | 0.39 [−1.58; 2.35] | 0.23 [−1.06; 1.51] | 0.12 [−0.94; 1.18] | **MIT** | - | 0.01 [−1.33; 1.34] |
| 0.80 [−0.17; 1.78] | 0.27 [−1.13; 1.68] | 0.37 [−1.77; 2.51] | 0.21 [−1.37; 1.80] | 0.11 [−1.64; 1.85] | −0.02 [−1.83; 1.79] | **Conventional therapy** | - |
| 1.01 [−0.82; 2.83] | 0.48 [−0.14; 1.10] | 0.57 [−1.15; 2.30] | 0.41 [−0.39; 1.22] | 0.31 [−0.80; 1.41] | 0.19 [−0.90; 1.27] | 0.20 [−1.34; 1.74] | **No intervention** |
| Network meta-analysis | | | | | | | |
| Data expressed as SMD [95% credible interval]. Significant results are underscored. “-” means data not applicable.  CIAT, constraint-induced aphasia therapy; PACE, promoting aphasics’ communicative effectiveness; CSLT, computerized speech and language therapy; MIT, melodic intonation therapy; M-MAT, multimodality aphasia therapy. | | | | | | | |

| Supplementary Table 8. Assessment of Inconsistencies Among Studies Regarding Motor Aphasia Performance of Patients in the Chronic Phase | | | | | | | | |
| --- | --- | --- | --- | --- | --- | --- | --- | --- |
| Comparison | Number of studies | Network meta-analysis | Direct comparison | Indirect comparison | Difference between direct and indirect comparisons | Lower limit of 95% CI | Upper limit of 95% CI | *P* value |
| CIAT vs. M-MAT | 2 | 0.0638 | 0.2596 | −1.7885 | 2.048 | −0.4177 | 4.5138 | 0.1035 |
| CIAT vs. no intervention | 3 | 0.4776 | 0.5294 | 0.1053 | 0.4241 | −1.4712 | 2.3194 | 0.661 |
| CIAT vs. PACE | 1 | 0.1691 | 0.0197 | 0.5521 | −0.5324 | −2.8372 | 1.7724 | 0.6507 |
| M-MAT vs. no intervention | 1 | 0.4138 | 0.7233 | −0.2356 | 0.9589 | −0.7693 | 2.6871 | 0.2768 |
| MIT vs. no intervention | 1 | 0.1859 | 0.0071 | 0.5395 | −0.5324 | −2.8372 | 1.7724 | 0.6507 |
| MIT vs. PACE | 1 | −0.1226 | 0.0397 | −0.4927 | 0.5324 | −1.7724 | 2.8372 | 0.6507 |
| CI, credible interval; CIAT, constraint-induced aphasia therapy; PACE, promoting aphasics’ communicative effectiveness; MIT, melodic intonation therapy; M-MAT, multimodality aphasia therapy. | | | | | | | | |

| Supplementary Table 9. Network Meta-Analysis Results for Sensory Aphasia Performance in All Patients | | | | | | |
| --- | --- | --- | --- | --- | --- | --- |
| Pairwise meta-analysis | | | | | | |
| **MIT** | - | 0.00 [−0.88; 0.88] | - | 0.03 [−0.93; 1.00] | - | 0.45 [−0.18; 1.07] |
| −0.14 [−1.57; 1.29] | **BOX therapy** | - | 0.25 [−1.07; 1.58] | - | - | - |
| 0.06 [−0.60; 0.72] | 0.20 [−1.27; 1.67] | **PACE** | −0.00 [−0.80; 0.80] | - | - | - |
| 0.11 [−0.43; 0.65] | 0.25 [−1.07; 1.58] | 0.05 [−0.59; 0.69] | **CIAT** | 0.14 [−0.46; 0.75] | - | 0.21 [−0.13; 0.54] |
| 0.19 [−0.45; 0.84] | 0.34 [−1.09; 1.76] | 0.13 [−0.66; 0.92] | 0.08 [−0.45; 0.62] | **No intervention** | - | - |
| 0.30 [−0.69; 1.29] | 0.44 [−1.16; 2.05] | 0.24 [−0.84; 1.32] | 0.19 [−0.72; 1.10] | 0.11 [−0.93; 1.15] | **CSLT** | 0.05 [−0.80; 0.90] |
| 0.35 [−0.17; 0.86] | 0.49 [−0.87; 1.85] | 0.29 [−0.39; 0.96] | 0.24 [−0.08; 0.55] | 0.15 [−0.44; 0.75] | 0.05 [−0.80; 0.90] | **Conventional therapy** |
| Network meta-analysis | | | | | | |
| Data are expressed as SMD [95% credible interval]. Significant results are underscored. “-” means data not applicable.  CIAT, constraint-induced aphasia therapy; PACE, promoting aphasics’ communicative effectiveness; CSLT, computerized speech and language therapy; MIT, melodic intonation therapy. | | | | | | |

| Supplementary Table 10. Assessment of Inconsistencies Among Studies Regarding Sensory Aphasia Performance in All Patients | | | | | | | | |
| --- | --- | --- | --- | --- | --- | --- | --- | --- |
| Comparison | Number of studies | Network meta-analysis | Direct comparison | Indirect comparison | Difference between direct and indirect comparisons | Lower limit of 95% CI | Upper limit of 95% CI | *P* value |
| CIAT vs. conventional therapy | 2 | 0.2359 | 0.2079 | 0.504 | −0.2961 | −1.3837 | 0.7915 | 0.5936 |
| CIAT vs. no intervention | 2 | 0.0815 | 0.1447 | −0.1421 | 0.2867 | −1.0072 | 1.5807 | 0.6641 |
| CIAT vs. PACE | 1 | −0.0506 | 0 | −0.1402 | 0.1402 | −1.1914 | 1.4718 | 0.8365 |
| Conventional therapy vs. MIT | 1 | −0.3472 | −0.4461 | −0.15 | −0.2961 | −1.3837 | 0.7915 | 0.5936 |
| MIT vs. no intervention | 1 | 0.1929 | 0.0331 | 0.3198 | −0.2867 | −1.5807 | 1.0072 | 0.6641 |
| MIT vs. PACE | 1 | 0.0608 | 0 | 0.1402 | −0.1402 | −1.4718 | 1.1914 | 0.8365 |
| CI, credible interval; CIAT, constraint-induced aphasia therapy; PACE, promoting aphasics’ communicative effectiveness; MIT, melodic intonation therapy. | | | | | | | | |

| Supplementary Table 11. Network Meta-Analysis Results for Sensory Aphasia Performance of Patients in the Chronic Phase | | | | |
| --- | --- | --- | --- | --- |
| Pairwise meta-analysis | | | | |
| **BOX therapy** | 0.25 [−1.07; 1.58] | - | - | - |
| 0.25 [−1.07; 1.58] | **CIAT** | 0.00 [−0.80; 0.80] | - | 0.14 [−0.46; 0.75] |
| 0.28 [−1.22; 1.78] | 0.03 [−0.67; 0.73] | **PACE** | −0.00 [−0.88; 0.88] | - |
| 0.31 [−1.25; 1.87] | 0.06 [−0.76; 0.88] | 0.03 [−0.71; 0.77] | **MIT** | 0.03 [−0.93; 1.00] |
| 0.38 [−1.06; 1.82] | 0.13 [−0.44; 0.69] | 0.10 [−0.69; 0.90] | 0.07 [−0.71; 0.85] | **No intervention** |
| Network meta-analysis | | | | |
| Data expressed as SMD [95% credible interval]. Significant results are underscored.“-” means data not applicable.  CIAT, constraint-induced aphasia therapy; PACE, promoting aphasics’ communicative effectiveness; MIT, melodic intonation therapy. | | | | |

| Supplementary Table 12. Assessment of Inconsistencies Among Studies Regarding Sensory Aphasia Performance of Patients in the Chronic Phase | | | | | | | | |
| --- | --- | --- | --- | --- | --- | --- | --- | --- |
| Comparison | Number of studies | Network meta-analysis | Direct comparison | Indirect comparison | Difference between direct and indirect comparisons | Lower limit of 95% CI | Upper limit of 95% CI | *P* value |
| CIAT vs. no intervention | 2 | 0.1295 | 0.1447 | 0.0331 | 0.1116 | −1.5348 | 1.7579 | 0.8943 |
| CIAT vs. PACE | 1 | 0.0264 | 0 | 0.1116 | −0.1116 | −1.7579 | 1.5348 | 0.8943 |
| MIT vs. no intervention | 1 | 0.0715 | 0.0331 | 0.1447 | −0.1116 | −1.7579 | 1.5348 | 0.8943 |
| MIT vs. PACE | 1 | −0.0316 | 0 | −0.1116 | 0.1116 | −1.5348 | 1.7579 | 0.8943 |
| CI, credible interval; CIAT, constraint-induced aphasia therapy; PACE, promoting aphasic communicative effectiveness; MIT, melodic intonation therapy. | | | | | | | | |
